# Supplementary material for: Investigation of aerodynamic interaction between the balloon and the ducted wind turbine in airborne configuration
Source: publisher site journal article supplement (doi:10.1515/ehs-2021-0067), 2022-01-01
Supplement: Supplementary file 1 [file j_ehs-2021-0067_suppl.docx]

The article "Investigation of aerodynamic interaction between the balloon and the ducted wind turbine in airborne configuration" aims to maximise power generation by optimising the separation gap of an airborne wind turbine energy generation system. The power generated is affected by the aerodynamic interaction between the balloon and the ducted wind turbine assembly. To maximise power generation, the gap between the balloon and the wind turbine assembly must be optimized. Through CFD analysis, the current study attempts to optimise the minimum distance between the balloon and the ducted wind turbine assembly.

The article titled “Investigation of aerodynamic interaction between the balloon and the ducted wind turbine in airborne configuration” attempts to optimize the separation gap of an airborne wind turbine energy generation system to maximize the power generation. Due to the aerodynamic interaction between the balloon and the ducted wind turbine assembly, the power generated gets effected. So, to maximize the power generation, an optimum gap between the balloon and the wind turbine assembly has to be maintained. The present study attempts to optimize the minimum distance between the balloon and the ducted wind turbine assembly through CFD analysis.

While the focus of world is gradually shifting from fossil based fuels, present research extends a viable option to fill th an aerodynamic analysis is presented in the current work, which estimates the separation distance between the balloon and the turbine in an airborne wind energy system (awes). The stability of the structure of awes depends on the aerodynamic interaction between the turbine and the balloon. A minimum gap must be maintained between the balloon and the wind turbine to reduce the interaction between the balloon and the turbine assembly. Three cases of awes have been studied with a separation gap of 5m, 10m, and 16m to estimate the minimum distance of separation between the balloon and the turbine. The aerodynamic interaction details suggest that a minimum distance of 13m needs to be maintained between the turbine and the balloon to avoid the interaction between the balloon and turbine. Steady-state simulations of the rotor are run for various wind conditions to evaluate the efficiency of the duct-mounted configuration. The ducted turbine configuration saw a 7.4% increase in torque than the inducted turbine for a wind speed of 5m s-1. A torque increase of 17.85% was observed when the separation distance was increased to 16m from earlier 10m.
